# Supplementary material
Source: Springer Nature journal article supplement (https://www.springermedizin.de/resource/supplementary/12891_2008_529_MOESM1_ESM.pdf/9511246)

Are you awaiting TKR?  
Data collected from 414  
participants

Yes  
 $n=24$   
(6%)

No  
 $n=390$   
(94%)

Would you accept  
if offered?  
(24 responded)

Would you accept  
if offered?  
(371 responded)

Yes  
 $n=15$   
(62%)

No  
 $n=4$   
(17%)

Unsure  
 $n=5$   
(21%)

Yes  
 $n=25$   
(7%)

No  
 $n=333$   
(90%)

Unsure  
 $n=13$   
(3%)

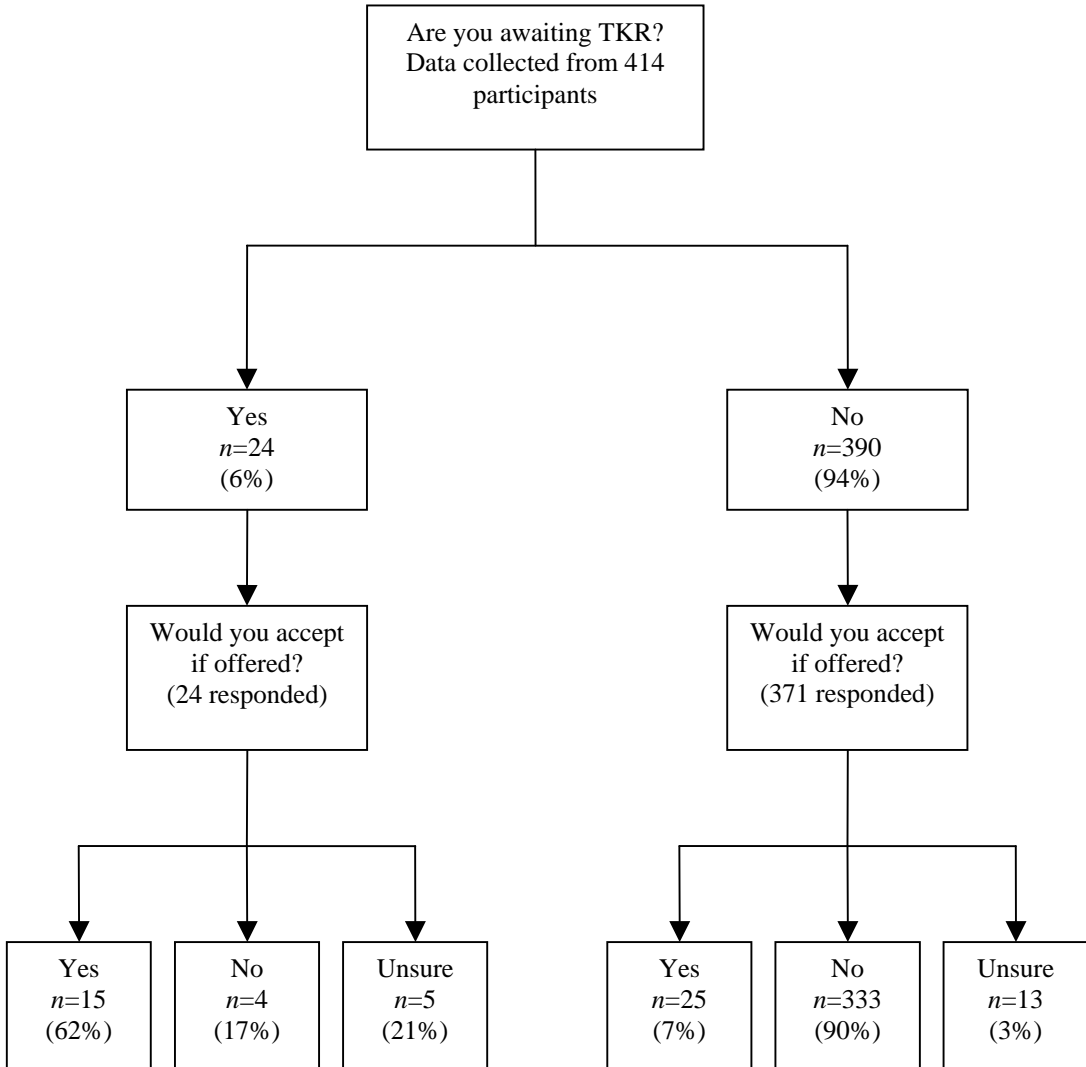

Supplement: MOESM1 [file 9511246]
